# Supplementary material for: Application of metal organic frameworks M(bdc)(ted)0.5 (M = Co, Zn, Ni, Cu) in the oxidation of benzyl alcohol
Source: Royal Society of Chemistry journal article supplement (doi:10.1039/c6ra12799a), 2016-01-01
Supplement: c6ra12799a1.pdf [file c6ra12799a1.pdf]

## Supplementary Information

### Application of Metal Organic Frameworks $M(\text{bdc})(\text{ted})_{0.5}$ ( $M = \text{Co}, \text{Zn}, \text{Ni}, \text{Cu}$ ) in oxidation of benzyl alcohol

Ling Peng<sup>a</sup>, Shujie Wu<sup>a</sup>, Xiaoyuan Yang<sup>a</sup>, Jing Hu<sup>a</sup>, Xiaoran Fu<sup>a</sup>, Qisheng Huo<sup>b</sup>, Jingqi Guan<sup>a\*</sup>

<sup>a</sup> Address, College of Chemistry, Jilin University, Changchun, 130023, P.R. China.

<sup>b</sup> Address, State Key Laboratory of Inorganic Synthesis and Preparative Chemistry, College of Chemistry, Jilin University, Changchun 130012, P.R. China.

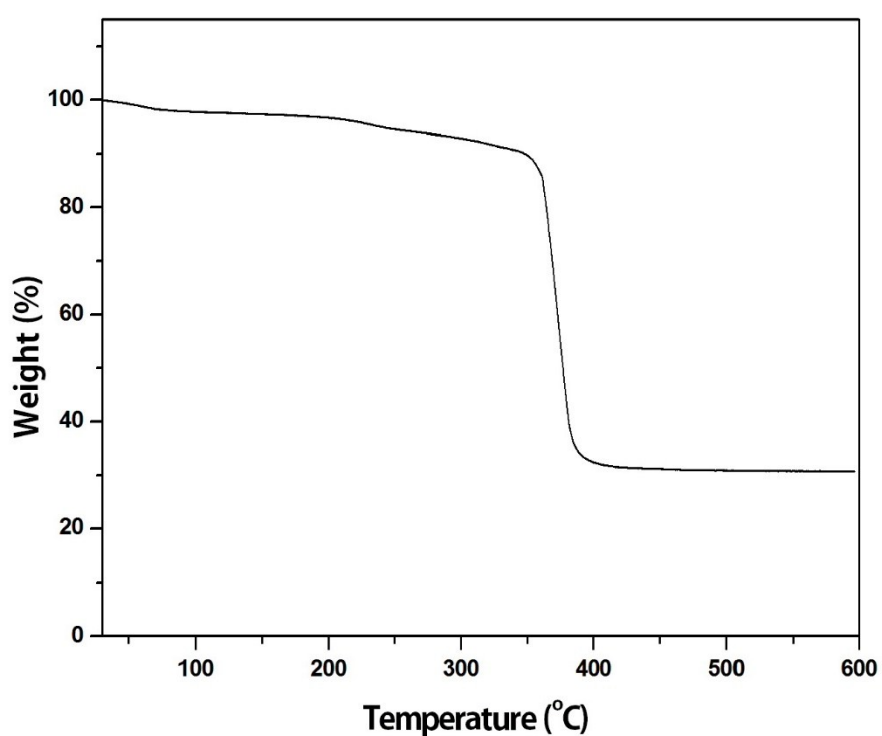

Fig. S1. TG curve of  $\text{Co}(\text{bdc})(\text{ted})_{0.5}$ .

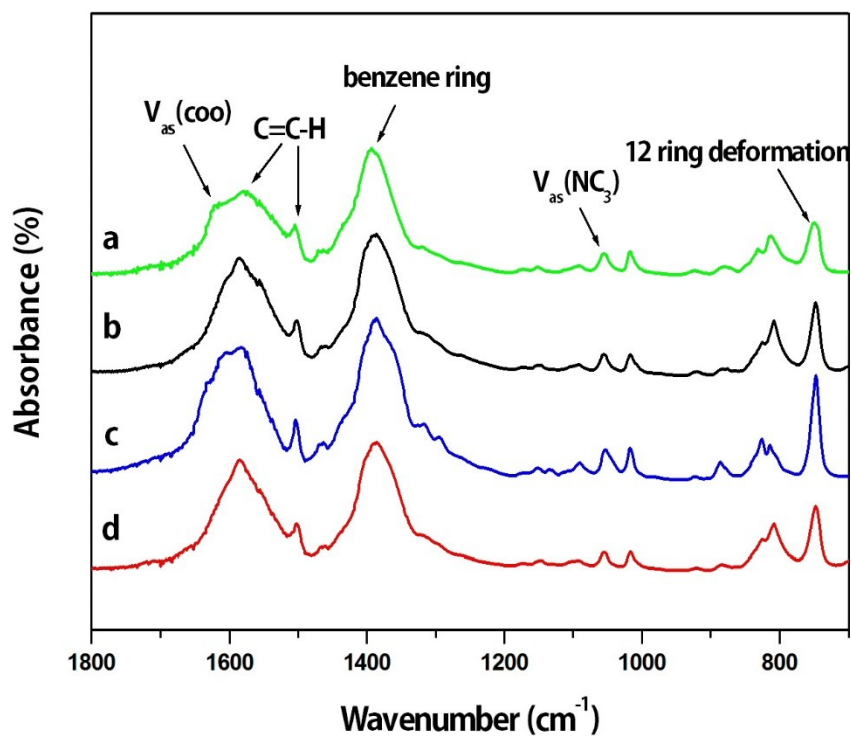

Fig. S2. FT-IR spectra of (a)  $\text{Cu}(\text{bdc})(\text{ted})_{0.5}$ , (b)  $\text{Zn}(\text{bdc})(\text{ted})_{0.5}$ , (c)  $\text{Co}(\text{bdc})(\text{ted})_{0.5}$  and (d)  $\text{Ni}(\text{bdc})(\text{ted})_{0.5}$ .

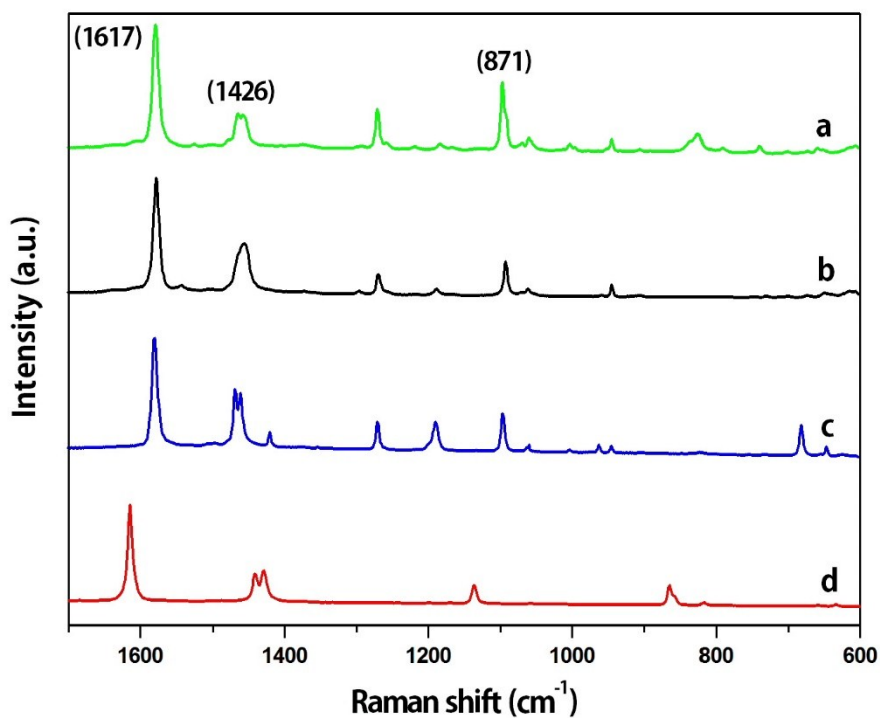

Fig. S3. Raman spectra of (a)  $\text{Cu}(\text{bdc})(\text{ted})_{0.5}$ , (b)  $\text{Co}(\text{bdc})(\text{ted})_{0.5}$ , (c)  $\text{Zn}(\text{bdc})(\text{ted})_{0.5}$  and (d)  $\text{Ni}(\text{bdc})(\text{ted})_{0.5}$ .

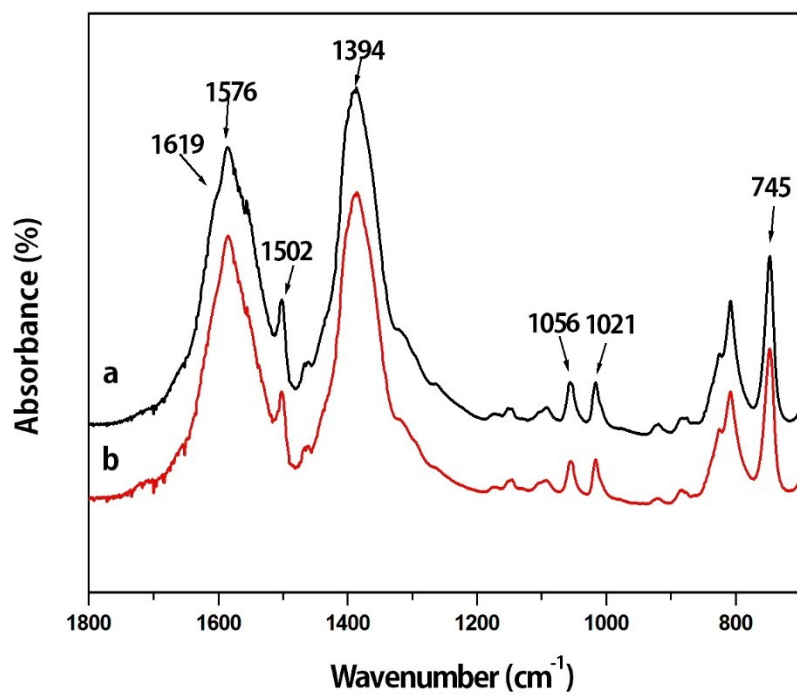

Fig. S4. IR spectra of the fresh (a) and reused (b) Co(bdc)(ted)<sub>0.5</sub> catalyst.

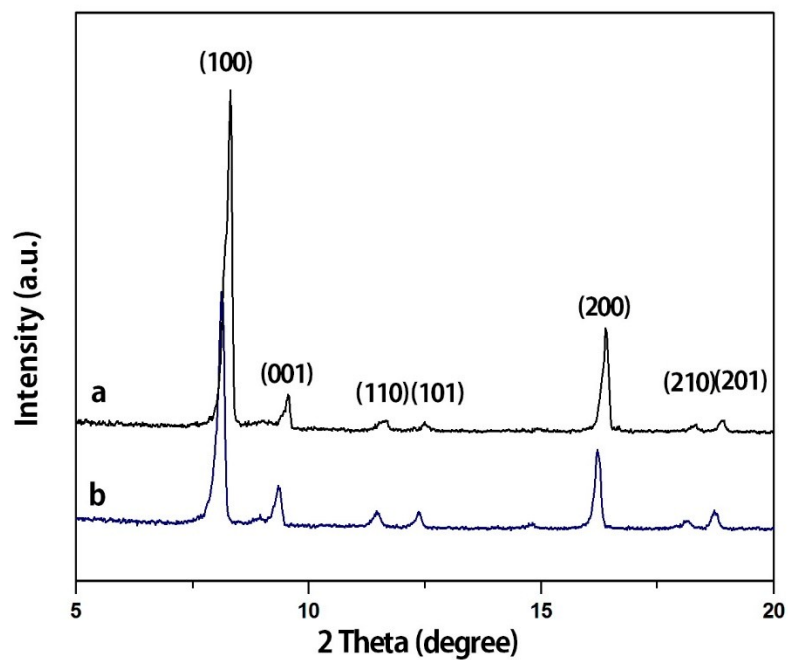

Fig. S5. XRD spectra of the fresh (a) and reused (b) Co(bdc)(ted)<sub>0.5</sub> catalyst.

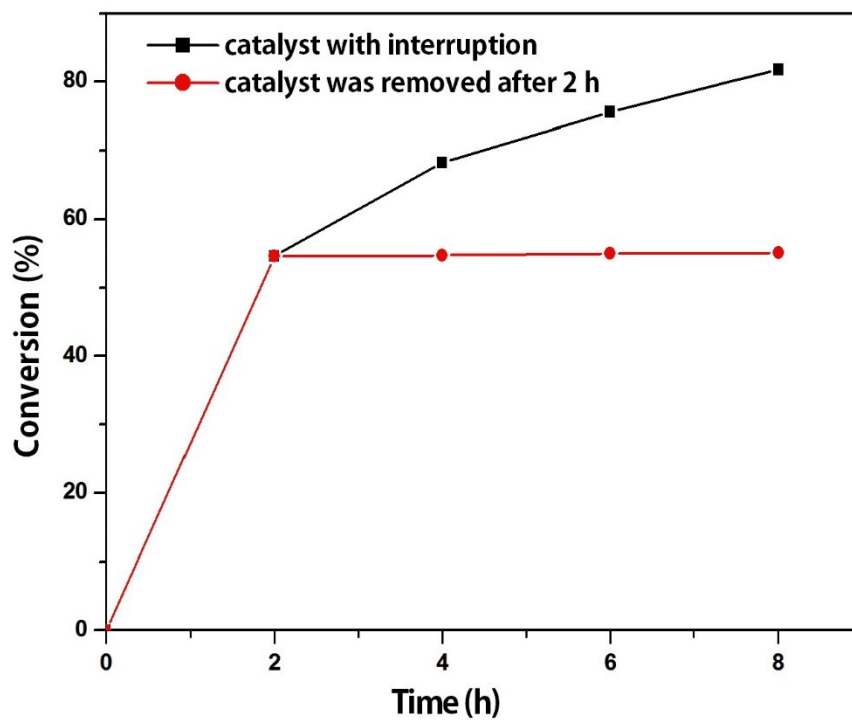

Fig. S6. Leaching experiment of  $\text{Co}(\text{bdc})(\text{ted})_{0.5}$  catalyst.
